# Supplementary material for: Comprehensive structure and functional adaptations of the yeast nuclear pore complex
Source: PubMed Central journal article supplement — Cell. Author manuscript; Available in PMC 2022 Mar 17. (PMC8928745; doi:10.1016/j.cell.2021.12.015), 2022-01-03
Supplement: NIHMS1767905-supplement-2.pdf [file NIHMS1767905-supplement-2.pdf]

**Table S1- Single particle and tomographic data collection, processing and modeling of the yeast NPC**  
 Related to Figures 1-6.

| Data collection                                       | Single particle                |                          | Cryo-ET                                                  |        |                      |
|-------------------------------------------------------|--------------------------------|--------------------------|----------------------------------------------------------|--------|----------------------|
| Microscope                                            | Titan-Krios-GIF                |                          | Titan-Krios-GIF                                          |        |                      |
| Detector/Energy Filter Slit                           | K2 Summit                      |                          | K2 Summit                                                |        |                      |
| Image mode                                            | Super-resolution counting      |                          | 20 keV<br>Counting<br>Dose-symmetric &<br>bi-directional |        |                      |
| Frames                                                | 40                             | Frames per tilt image    | 12                                                       |        |                      |
| Total electron dose (e <sup>-</sup> /Å <sup>2</sup> ) | 40.0                           |                          | ~100-180                                                 |        |                      |
| Nominal pixel size (Å)                                | 2.66                           |                          | 3.43                                                     |        |                      |
| Defocus range (µm)                                    | -1.5 to -3.8                   |                          | -3 to -5                                                 |        |                      |
| Movies (after triage)                                 | 4015 (3218)                    |                          | 293                                                      |        |                      |
| NPCs after cleaning                                   | 26049                          |                          | 518                                                      |        |                      |
| <b>3D reconstruction</b>                              | <b>Spoke</b>                   | <b>Double outer ring</b> | <b>Per-spoke</b>                                         |        |                      |
| Symmetry imposed                                      | C1                             | C1                       | C1                                                       |        |                      |
| Software                                              | RELION 2.1, 3.0                | RELION 2.1, 3.0          | EMAN2                                                    |        |                      |
| Initial subunits/final particles                      | 208393/145000                  | 208393/45000             | 3656/3290                                                |        |                      |
| Pixel size (Å)                                        | --                             | 3.99                     | 3.37 (bin2- 6.74)                                        |        |                      |
| Map resolution (Å)-masked                             | 7.6                            | 11.3                     | 37 (spoke)                                               |        |                      |
| FSC threshold 0.143                                   |                                |                          | 40 (C8 protomer)                                         |        |                      |
| Local resolution range (Å)                            | 6.6-11.0                       | 11-17                    | 30-60                                                    |        |                      |
| B-factor for sharpening (Å <sup>2</sup> )             | -423                           | -800 (ad hoc)            | --                                                       |        |                      |
| <b>Modeling</b>                                       |                                |                          |                                                          |        |                      |
| Software-                                             | Chimera, Coot,<br>Phenix, MDFF | Chimera, Coot, MDFF      | Chimera, Coot, MDFF                                      |        |                      |
| NPC component                                         | Full spoke                     | N-ring                   | Spoke                                                    | N-ring | C-ring + Nup82c-Dyn2 |
| Ordered mass (MDa) /protomer                          | 1.69                           | 0.98                     | 1.69                                                     | 0.49   | 0.75                 |
| Number of proteins                                    | 28                             | 14                       | 28                                                       | 7      | 19                   |
| Chimera map cross-correlation                         | 0.915                          | 0.952                    | 0.9237                                                   | 0.8750 | 0.8824               |
